# Supplementary material for: lobChIP: from cells to sequencing ready ChIP libraries in a single day
Source: PubMed Central journal article supplement (PMC4507313; doi:10.1186/s13072-015-0017-5), 2015-07-21

|    |                  |                                                                                                                                                                                                                                                       |
|----|------------------|-------------------------------------------------------------------------------------------------------------------------------------------------------------------------------------------------------------------------------------------------------|
| 1  | Set Variable     | Number of samples<br>"How many samples?"<br>"How many samples?", 1 - 96                                                                                                                                                                               |
| 2  | Wash Tips        |  3.0 + 4.0 ml                                                                                                                                                        |
| 3  | Group            | Wash RIPA                                                                                                                                                                                                                                             |
| 4  | Set Variable     | SAMPLE_CNT = Number of samples                                                                                                                                                                                                                        |
| 5  | Begin Loop       | 24 times "Wash RIPA_1"                                                                                                                                                                                                                                |
| 6  | Get DiTis        |  DiTi aluminium 200 ul                                                                                                                                               |
| 7  | Aspirate         |   100 µl Helena Water free dispense<br>"Magnet pos 1" (Col. 1, Rows 1-4) , 1 option |
| 8  | Drop DiTis       |  DiTi LiHa Waste                                                                                                                                                     |
| 9  | End Loop         | "Wash RIPA_1"                                                                                                                                                                                                                                         |
| 10 | Set Variable     | SAMPLE_CNT = -1                                                                                                                                                                                                                                       |
| 11 | Set Variable     | SAMPLE_CNT = Number of samples                                                                                                                                                                                                                        |
| 12 | Begin Loop       | 24 times "Wash RIPA_1"                                                                                                                                                                                                                                |
| 13 | Get DiTis        |  DiTi aluminium 200 ul                                                                                                                                             |
| 14 | Aspirate         |   150 µl Water free dispense<br>"RIPA" (Col. 1, Rows 3-6)                       |
| 15 | Dispense         |   150 µl Water Detect 500µL<br>"Magnet pos 1" (Col. 1, Rows 1-4) , 1 option     |
| 16 | Drop DiTis       |  DiTi LiHa Waste                                                                                                                                                   |
| 17 | End Loop         | "Wash RIPA_1"                                                                                                                                                                                                                                         |
| 18 | Set Variable     | SAMPLE_CNT = -1                                                                                                                                                                                                                                       |
| 19 | Drop DiTis       |  DiTi LiHa Waste                                                                                                                                                   |
| 20 | Transfer Labware | Source: Grid '14,' Site '3'; Destination: Grid '14', Site '4'; Narrow (MCA96 1)                                                                                                                                                                       |
| 21 | Transfer Labware | Source: Grid '14,' Site '4'; Destination: Grid '14', Site '3'; Narrow (MCA96 1)                                                                                                                                                                       |
| 22 | Transfer Labware | Source: Grid '14,' Site '3'; Destination: Grid '14', Site '4'; Narrow (MCA96 1)                                                                                                                                                                       |
| 23 | Transfer Labware | Source: Grid '14,' Site '4'; Destination: Grid '14', Site '3'; Narrow (MCA96 1)                                                                                                                                                                       |

|    |                  |                                                                                                                                                                                                                                                       |
|----|------------------|-------------------------------------------------------------------------------------------------------------------------------------------------------------------------------------------------------------------------------------------------------|
| 24 | Start Timer      | 2                                                                                                                                                                                                                                                     |
| 25 | Wait for Timer   | Timer 2 : 60 sec                                                                                                                                                                                                                                      |
| 26 | Set Variable     | SAMPLE_CNT = Number of samples                                                                                                                                                                                                                        |
| 27 | Begin Loop       | 24 times "Wash RIPA_2"                                                                                                                                                                                                                                |
| 28 | Get DiTis        |  DiTi aluminium 200 ul                                                                                                                                               |
| 29 | Aspirate         |   150 µl Helena Water free dispense<br>"Magnet pos 1" (Col. 1, Rows 1-4) , 1 option |
| 30 | Drop DiTis       |  DiTi LiHa Waste                                                                                                                                                     |
| 31 | End Loop         | "Wash RIPA_2"                                                                                                                                                                                                                                         |
| 32 | Set Variable     | SAMPLE_CNT = -1                                                                                                                                                                                                                                       |
| 33 | Set Variable     | SAMPLE_CNT = Number of samples                                                                                                                                                                                                                        |
| 34 | Begin Loop       | 24 times "Wash RIPA_3"                                                                                                                                                                                                                                |
| 35 | Get DiTis        |  DiTi aluminium 200 ul                                                                                                                                             |
| 36 | Aspirate         |   150 µl Water free dispense<br>"RIPA" (Col. 1, Rows 3-6)                       |
| 37 | Dispense         |   150 µl Water Detect 500µL<br>"Magnet pos 1" (Col. 1, Rows 1-4) , 1 option     |
| 38 | Drop DiTis       |  DiTi LiHa Waste                                                                                                                                                   |
| 39 | End Loop         | "Wash RIPA_3"                                                                                                                                                                                                                                         |
| 40 | Set Variable     | SAMPLE_CNT = -1                                                                                                                                                                                                                                       |
| 41 | Transfer Labware | Source: Grid '14,' Site '3'; Destination: Grid '14', Site '4'; Narrow (MCA96 1)                                                                                                                                                                       |
| 42 | Transfer Labware | Source: Grid '14,' Site '4'; Destination: Grid '14', Site '3'; Narrow (MCA96 1)                                                                                                                                                                       |
| 43 | Transfer Labware | Source: Grid '14,' Site '3'; Destination: Grid '14', Site '4'; Narrow (MCA96 1)                                                                                                                                                                       |
| 44 | Transfer Labware | Source: Grid '14,' Site '4'; Destination: Grid '14', Site '3'; Narrow (MCA96 1)                                                                                                                                                                       |
| 45 | Start Timer      | 3                                                                                                                                                                                                                                                     |
| 46 | Wait for Timer   | Timer 3 : 60 sec                                                                                                                                                                                                                                      |
| 47 | Set Variable     | SAMPLE_CNT = Number of samples                                                                                                                                                                                                                        |

|    |                  |                                                                                                                                                                                                                                                       |
|----|------------------|-------------------------------------------------------------------------------------------------------------------------------------------------------------------------------------------------------------------------------------------------------|
| 48 | Begin Loop       | 24 times "Wash RIPA_4"                                                                                                                                                                                                                                |
| 49 | Get DiTis        |  DiTi aluminium 200 ul                                                                                                                                               |
| 50 | Aspirate         |   150 µl Helena Water free dispense<br>"Magnet pos 1" (Col. 1, Rows 1-4) , 1 option |
| 51 | Drop DiTis       |  DiTi LiHa Waste                                                                                                                                                     |
| 52 | End Loop         | "Wash RIPA_4"                                                                                                                                                                                                                                         |
| 53 | Set Variable     | SAMPLE_CNT = -1                                                                                                                                                                                                                                       |
| 54 | Group End        | Wash RIPA                                                                                                                                                                                                                                             |
| 55 | Group            | Wash IPWB2                                                                                                                                                                                                                                            |
| 56 | Set Variable     | SAMPLE_CNT = Number of samples                                                                                                                                                                                                                        |
| 57 | Begin Loop       | 24 times "Wash IPWB2_1"                                                                                                                                                                                                                               |
| 58 | Get DiTis        |  DiTi aluminium 200 ul                                                                                                                                              |
| 59 | Aspirate         |  150 µl Water free dispense<br>"IPWB2" (Col. 1, Rows 3-6)                                                                                                          |
| 60 | Dispense         |   150 µl Water Detect 500µL<br>"Magnet pos 1" (Col. 1, Rows 1-4) , 1 option     |
| 61 | Drop DiTis       |  DiTi LiHa Waste                                                                                                                                                   |
| 62 | End Loop         | "Wash IPWB2_1"                                                                                                                                                                                                                                        |
| 63 | Set Variable     | SAMPLE_CNT = -1                                                                                                                                                                                                                                       |
| 64 | Transfer Labware | Source: Grid '14,' Site '3'; Destination: Grid '14', Site '4'; Narrow (MCA96 1)                                                                                                                                                                       |
| 65 | Transfer Labware | Source: Grid '14,' Site '4'; Destination: Grid '14', Site '3'; Narrow (MCA96 1)                                                                                                                                                                       |
| 66 | Transfer Labware | Source: Grid '14,' Site '3'; Destination: Grid '14', Site '4'; Narrow (MCA96 1)                                                                                                                                                                       |
| 67 | Transfer Labware | Source: Grid '14,' Site '4'; Destination: Grid '14', Site '3'; Narrow (MCA96 1)                                                                                                                                                                       |
| 68 | Start Timer      | 4                                                                                                                                                                                                                                                     |
| 69 | Wait for Timer   | Timer 4 : 60 sec                                                                                                                                                                                                                                      |
| 70 | Set Variable     | SAMPLE_CNT = Number of samples                                                                                                                                                                                                                        |
| 71 | Begin Loop       | 24 times "Wash IPWB2_2"                                                                                                                                                                                                                               |

|    |                  |                                                                                                                                                                         |                                                                                   |
|----|------------------|-------------------------------------------------------------------------------------------------------------------------------------------------------------------------|-----------------------------------------------------------------------------------|
| 72 | Get DiTis        |                                                                                        | DiTi aluminium 200 ul                                                             |
| 73 | Aspirate         |       | 150 µl Helena Water free dispense<br>"Magnet pos 1" (Col. 1, Rows 1-4) , 1 option |
| 74 | Drop DiTis       |                                                                                        | DiTi LiHa Waste                                                                   |
| 75 | End Loop         |                                                                                                                                                                         | "Wash IPWB2_2"                                                                    |
| 76 | Set Variable     |                                                                                                                                                                         | SAMPLE_CNT = -1                                                                   |
| 77 | Set Variable     |                                                                                                                                                                         | SAMPLE_CNT = Number of samples                                                    |
| 78 | Begin Loop       |                                                                                                                                                                         | 24 times "Wash IPWB2_3"                                                           |
| 79 | Get DiTis        |                                                                                        | DiTi aluminium 200 ul                                                             |
| 80 | Aspirate         |       | 150 µl Water free dispense<br>"IPWB2" (Col. 1, Rows 3-6)                          |
| 81 | Dispense         |       | 150 µl Water Detect 500µL<br>"Magnet pos 1" (Col. 1, Rows 1-4) , 1 option         |
| 82 | Drop DiTis       |                                                                                       | DiTi LiHa Waste                                                                   |
| 83 | End Loop         |                                                                                                                                                                         | "Wash IPWB2_3"                                                                    |
| 84 | Set Variable     |                                                                                                                                                                         | SAMPLE_CNT = -1                                                                   |
| 85 | Transfer Labware |                                                                                                                                                                         | Source: Grid '14,' Site '3'; Destination: Grid '14', Site '4'; Narrow (MCA96 1)   |
| 86 | Transfer Labware |                                                                                                                                                                         | Source: Grid '14,' Site '4'; Destination: Grid '14', Site '3'; Narrow (MCA96 1)   |
| 87 | Transfer Labware |                                                                                                                                                                         | Source: Grid '14,' Site '3'; Destination: Grid '14', Site '4'; Narrow (MCA96 1)   |
| 88 | Transfer Labware |                                                                                                                                                                         | Source: Grid '14,' Site '4'; Destination: Grid '14', Site '3'; Narrow (MCA96 1)   |
| 89 | Start Timer      |                                                                                                                                                                         | 5                                                                                 |
| 90 | Wait for Timer   |                                                                                                                                                                         | Timer 5 : 60 sec                                                                  |
| 91 | Set Variable     |                                                                                                                                                                         | SAMPLE_CNT = Number of samples                                                    |
| 92 | Begin Loop       |                                                                                                                                                                         | 24 times "Wash IPWB2_4"                                                           |
| 93 | Get DiTis        |                                                                                      | DiTi aluminium 200 ul                                                             |
| 94 | Aspirate         |   | 150 µl Helena Water free dispense<br>"Magnet pos 1" (Col. 1, Rows 1-4) , 1 option |
| 95 | Drop DiTis       |                                                                                      | DiTi LiHa Waste                                                                   |

|     |                  |                                                                                                                                                                |
|-----|------------------|----------------------------------------------------------------------------------------------------------------------------------------------------------------|
| 96  | End Loop         | "Wash IPWB2_4"                                                                                                                                                 |
| 97  | Set Variable     | SAMPLE_CNT = -1                                                                                                                                                |
| 98  | Group End        | Wash IPWB2                                                                                                                                                     |
| 99  | Group            | Wash PBS                                                                                                                                                       |
| 100 | Set Variable     | SAMPLE_CNT = Number of samples                                                                                                                                 |
| 101 | Begin Loop       | 24 times "Wash PBS_1"                                                                                                                                          |
| 102 | Get DiTis        |  DiTi aluminium 200 ul                                                        |
| 103 | Aspirate         |  150 µl Water free dispense<br>"PBS" (Col. 1, Rows 3-6)                       |
| 104 | Dispense         |  150 µl Water Detect 500µL<br>"Magnet pos 1" (Col. 1, Rows 1-4) , 1 option    |
| 105 | Drop DiTis       |  DiTi LiHa Waste                                                              |
| 106 | End Loop         | "Wash PBS_1"                                                                                                                                                   |
| 107 | Set Variable     | SAMPLE_CNT = -1                                                                                                                                                |
| 108 | Transfer Labware | Source: Grid '14,' Site '3'; Destination: Grid '14', Site '4'; Narrow (MCA96 1)                                                                                |
| 109 | Transfer Labware | Source: Grid '14,' Site '4'; Destination: Grid '14', Site '3'; Narrow (MCA96 1)                                                                                |
| 110 | Transfer Labware | Source: Grid '14,' Site '3'; Destination: Grid '14', Site '4'; Narrow (MCA96 1)                                                                                |
| 111 | Transfer Labware | Source: Grid '14,' Site '4'; Destination: Grid '14', Site '3'; Narrow (MCA96 1)                                                                                |
| 112 | Set Variable     | SAMPLE_CNT = Number of samples                                                                                                                                 |
| 113 | Begin Loop       | 24 times "Wash PBS_2"                                                                                                                                          |
| 114 | Get DiTis        |  DiTi aluminium 200 ul                                                      |
| 115 | Aspirate         |  150 µl Water free dispense<br>"Magnet pos 1" (Col. 1, Rows 1-4) , 1 option |
| 116 | Drop DiTis       |  DiTi LiHa Waste                                                            |
| 117 | End Loop         | "Wash PBS_2"                                                                                                                                                   |
| 118 | Set Variable     | SAMPLE_CNT = -1                                                                                                                                                |
| 119 | Set Variable     | SAMPLE_CNT = Number of samples                                                                                                                                 |

|     |                  |                                                                                                                                                                                                                                                                |
|-----|------------------|----------------------------------------------------------------------------------------------------------------------------------------------------------------------------------------------------------------------------------------------------------------|
| 120 | Begin Loop       | 24 times "Wash PBS_3"                                                                                                                                                                                                                                          |
| 121 | Get DiTis        |  DiTi aluminium 200 ul                                                                                                                                                        |
| 122 | Aspirate         |  150 µl Water free dispense<br>"PBS" (Col. 1, Rows 3-6)                                                                                                                       |
| 123 | Dispense         |   150 µl Water Detect 500µL<br>"Magnet pos 1" (Col. 1, Rows 1-4) , 1 option                  |
| 124 | Drop DiTis       |  DiTi LiHa Waste                                                                                                                                                              |
| 125 | End Loop         | "Wash PBS_3"                                                                                                                                                                                                                                                   |
| 126 | Set Variable     | SAMPLE_CNT = -1                                                                                                                                                                                                                                                |
| 127 | Transfer Labware | Source: Grid '14,' Site '3'; Destination: Grid '14,' Site '4'; Narrow (MCA96 1)                                                                                                                                                                                |
| 128 | Transfer Labware | Source: Grid '14,' Site '4'; Destination: Grid '14,' Site '3'; Narrow (MCA96 1)                                                                                                                                                                                |
| 129 | Transfer Labware | Source: Grid '14,' Site '3'; Destination: Grid '14,' Site '4'; Narrow (MCA96 1)                                                                                                                                                                                |
| 130 | Transfer Labware | Source: Grid '14,' Site '4'; Destination: Grid '14,' Site '3'; Narrow (MCA96 1)                                                                                                                                                                                |
| 131 | Transfer Labware | Source: Grid '14,' Site '3'; Destination: Grid '14,' Site '2'; Narrow (MCA96 1)                                                                                                                                                                                |
| 132 | Group End        | Wash PBS                                                                                                                                                                                                                                                       |
| 133 | Group            | Transfer to new plate and discard PBS                                                                                                                                                                                                                          |
| 134 | Set Variable     | SAMPLE_CNT = Number of samples                                                                                                                                                                                                                                 |
| 135 | Begin Loop       | 24 times "New plate"                                                                                                                                                                                                                                           |
| 136 | Get DiTis        |  DiTi aluminium 200 ul                                                                                                                                                      |
| 137 | Mix              |   1 x 150 µl Helena Water free dispense<br>"Working plate" (Col. 1, Rows 1-4) , 1 option |
| 138 | Aspirate         |   180 µl Water free dispense<br>"Working plate" (Col. 1, Rows 1-4) , 1 option            |
| 139 | Dispense         |   180 µl Helena Water free dispense<br>"New plate" (Col. 1, Rows 1-4) , 1 option         |
| 140 | Drop DiTis       |  DiTi LiHa Waste                                                                                                                                                            |
| 141 | End Loop         | "New plate"                                                                                                                                                                                                                                                    |
| 142 | Set Variable     | SAMPLE_CNT = -1                                                                                                                                                                                                                                                |
| 143 | Transfer Labware | Source: Grid '14,' Site '1'; Destination: Grid '14,' Site '3'; Narrow (MCA96 1)                                                                                                                                                                                |

|     |                  |                                                                                                                                                                                                                                                        |
|-----|------------------|--------------------------------------------------------------------------------------------------------------------------------------------------------------------------------------------------------------------------------------------------------|
| 144 | Start Timer      | 6                                                                                                                                                                                                                                                      |
| 145 | Transfer Labware | Source: Grid '14,' Site '2'; Destination: Grid '32', Site '19'; Narrow (MCA96 1)                                                                                                                                                                       |
| 146 | Wait for Timer   | Timer 5 : 60 sec                                                                                                                                                                                                                                       |
| 147 | User Prompt      | "Put new plate on site 1"<br>"<br>sound : once                                                                                                                                                                                                         |
| 148 | Set Variable     | SAMPLE_CNT = Number of samples                                                                                                                                                                                                                         |
| 149 | Begin Loop       | 24 times "To new plate"                                                                                                                                                                                                                                |
| 150 | Get DiTis        |  DITI aluminium 200 ul                                                                                                                                                |
| 151 | Aspirate         |   150 µl Helena Water free dispense "Magnet pos 1" (Col. 1, Rows 1-4)                |
| 152 | Drop DiTis       |  DITI LiHa Waste                                                                                                                                                      |
| 153 | End Loop         | "To new plate"                                                                                                                                                                                                                                         |
| 154 | Set Variable     | SAMPLE_CNT = -1                                                                                                                                                                                                                                        |
| 155 | Group End        | Transfer to new plate and discard PBS                                                                                                                                                                                                                  |
| 156 | Group            | End-repair                                                                                                                                                                                                                                             |
| 157 | Transfer Labware | Source: Grid '14,' Site '3'; Destination: Grid '14', Site '2'; Narrow (MCA96 1)                                                                                                                                                                        |
| 158 | Get DiTis        |  DITI aluminium 200 ul                                                                                                                                              |
| 159 | Set Variable     | SAMPLE_CNT = Number of samples                                                                                                                                                                                                                         |
| 160 | Begin Loop       | 24 times "End repair"                                                                                                                                                                                                                                  |
| 161 | Aspirate         |   25 µl Helena Water free dispense "Labware1" (Col. 1, Row 2)                    |
| 162 | Aspirate         |   25 µl Helena Water free dispense "Labware1" (Col. 1, Row 2)                    |
| 163 | Aspirate         |   25 µl Helena Water free dispense "Labware1" (Col. 1, Row 2)                    |
| 164 | Aspirate         |   25 µl Helena Water free dispense "Labware1" (Col. 1, Row 2)                    |
| 165 | Dispense         |   25 µl Helena Water free dispense "Working plate" (Col. 1, Rows 1-4) , 1 option |
| 166 | End Loop         | "End repair"                                                                                                                                                                                                                                           |

|     |                  |                                                                                                                                                                                                                                                          |
|-----|------------------|----------------------------------------------------------------------------------------------------------------------------------------------------------------------------------------------------------------------------------------------------------|
| 167 | Set Variable     | SAMPLE_CNT = -1                                                                                                                                                                                                                                          |
| 168 | Drop DiTis       |  DiTi LiHa Waste                                                                                                                                                        |
| 169 | Get DiTis        | Grid 32; Site: 2 (DiTi 200ul Nested MCA96)<br>Fetch 8 rows and 12 columns                                                                                                                                                                                |
| 170 | Mix              |  35 µl Helena Water free dispense<br>"Working plate" (Col. 1, Rows 1-8)                                                                                                 |
| 171 | Begin Loop       | 6 times "4 first wells"                                                                                                                                                                                                                                  |
| 172 | Start Timer      | 1                                                                                                                                                                                                                                                        |
| 173 | Wait for Timer   | Timer 1 : 300 sec                                                                                                                                                                                                                                        |
| 174 | Mix              |  35 µl Helena Water free dispense<br>"Working plate" (Col. 1, Rows 1-8)                                                                                                 |
| 175 | End Loop         | "4 first wells"                                                                                                                                                                                                                                          |
| 176 | Drop DiTis       | Grid 32; Site: 19 (DiTi Nested Waste)                                                                                                                                                                                                                    |
| 177 | Transfer Labware | Source: Grid '14,' Site '2'; Destination: Grid '14,' Site '3'; Narrow<br>(MCA96 1)                                                                                                                                                                       |
| 178 | Start Timer      | 2                                                                                                                                                                                                                                                        |
| 179 | Transfer Labware | Source: Grid '32,' Site '2'; Destination: Grid '32,' Site '19'; Narrow<br>(MCA96 1)                                                                                                                                                                      |
| 180 | Wait for Timer   | Timer 2 : 30 sec                                                                                                                                                                                                                                         |
| 181 | Group End        | End-repair                                                                                                                                                                                                                                               |
| 182 | Group            | Wash after End-repair                                                                                                                                                                                                                                    |
| 183 | Set Variable     | SAMPLE_CNT = Number of samples                                                                                                                                                                                                                           |
| 184 | Begin Loop       | 24 times "wash End-repair"                                                                                                                                                                                                                               |
| 185 | Get DiTis        |  DiTi aluminium 200 ul                                                                                                                                                |
| 186 | Aspirate         |   25 µl Helena Water free dispense<br>"Magnet pos 1" (Col. 1, Rows 1-4) , 1 option |
| 187 | Drop DiTis       |  DiTi LiHa Waste                                                                                                                                                      |
| 188 | End Loop         | "wash End-repair"                                                                                                                                                                                                                                        |
| 189 | Set Variable     | SAMPLE_CNT = -1                                                                                                                                                                                                                                          |
| 190 | Get DiTis        |  DiTi aluminium 200 ul                                                                                                                                                |



|     |                  |                                                                                                                                                                                                                                                       |
|-----|------------------|-------------------------------------------------------------------------------------------------------------------------------------------------------------------------------------------------------------------------------------------------------|
| 191 | Set Variable     | SAMPLE_CNT = Number of samples                                                                                                                                                                                                                        |
| 192 | Begin Loop       | 24 times "wash End-repair"                                                                                                                                                                                                                            |
| 193 | Aspirate         |  100 µl Water free dispense<br>"PBS" (Col. 1, Rows 3-6)                                                                                                              |
| 194 | Dispense         |   100 µl Helena Water free dispense<br>"Magnet pos 1" (Col. 1, Rows 1-4) , 1 option |
| 195 | End Loop         | "wash End-repair"                                                                                                                                                                                                                                     |
| 196 | Set Variable     | SAMPLE_CNT = -1                                                                                                                                                                                                                                       |
| 197 | Drop DiTis       |  DiTi LiHa Waste                                                                                                                                                     |
| 198 | Move LIHA        |   Positioning with global Z-Travel<br>"200 µl DiTi 1" (Col. 1, Rows 1-4)            |
| 199 | Transfer Labware | Source: Grid '14,' Site '3'; Destination: Grid '14,' Site '4'; Narrow<br>(MCA96 1)                                                                                                                                                                    |
| 200 | Transfer Labware | Source: Grid '14,' Site '4'; Destination: Grid '14,' Site '3'; Narrow<br>(MCA96 1)                                                                                                                                                                    |
| 201 | Transfer Labware | Source: Grid '14,' Site '3'; Destination: Grid '14,' Site '4'; Narrow<br>(MCA96 1)                                                                                                                                                                    |
| 202 | Transfer Labware | Source: Grid '14,' Site '4'; Destination: Grid '14,' Site '3'; Narrow<br>(MCA96 1)                                                                                                                                                                    |
| 203 | Transfer Labware | Source: Grid '14,' Site '3'; Destination: Grid '14,' Site '4'; Narrow<br>(MCA96 1)                                                                                                                                                                    |
| 204 | Transfer Labware | Source: Grid '14,' Site '4'; Destination: Grid '14,' Site '3'; Narrow<br>(MCA96 1)                                                                                                                                                                    |
| 205 | Start Timer      | 3                                                                                                                                                                                                                                                     |
| 206 | Wait for Timer   | Timer 3 : 30 sec                                                                                                                                                                                                                                      |
| 207 | Set Variable     | SAMPLE_CNT = Number of samples                                                                                                                                                                                                                        |
| 208 | Begin Loop       | 24 times "wash End-repair"                                                                                                                                                                                                                            |
| 209 | Get DiTis        |  DiTi aluminium 200 ul                                                                                                                                             |
| 210 | Aspirate         |   105 µl Helena Water free dispense<br>"Magnet pos 1" (Col. 1, Rows 1-4)        |
| 211 | Drop DiTis       |  DiTi LiHa Waste                                                                                                                                                   |
| 212 | End Loop         | "wash End-repair"                                                                                                                                                                                                                                     |
| 213 | Set Variable     | SAMPLE_CNT = -1                                                                                                                                                                                                                                       |
| 214 | Get DiTis        |  DiTi aluminium 200 ul                                                                                                                                             |

|     |                  |                                                                                                                                                                                                                                                       |
|-----|------------------|-------------------------------------------------------------------------------------------------------------------------------------------------------------------------------------------------------------------------------------------------------|
| 215 | Set Variable     | SAMPLE_CNT = Number of samples                                                                                                                                                                                                                        |
| 216 | Begin Loop       | 24 times "wash End-repair"                                                                                                                                                                                                                            |
| 217 | Aspirate         |  100 µl Water free dispense<br>"PBS" (Col. 1, Rows 3-6)                                                                                                              |
| 218 | Dispense         |   100 µl Helena Water free dispense<br>"Magnet pos 1" (Col. 1, Rows 1-4) , 1 option |
| 219 | End Loop         | "wash End-repair"                                                                                                                                                                                                                                     |
| 220 | Set Variable     | SAMPLE_CNT = -1                                                                                                                                                                                                                                       |
| 221 | Drop DiTis       |  DiTi LiHa Waste                                                                                                                                                     |
| 222 | Move LIHA        |   Positioning with global Z-Travel<br>"200 µl DiTi 1" (Col. 1, Rows 1-4)            |
| 223 | Transfer Labware | Source: Grid '14,' Site '3'; Destination: Grid '14,' Site '4'; Narrow (MCA96 1)                                                                                                                                                                       |
| 224 | Transfer Labware | Source: Grid '14,' Site '4'; Destination: Grid '14,' Site '3'; Narrow (MCA96 1)                                                                                                                                                                       |
| 225 | Transfer Labware | Source: Grid '14,' Site '3'; Destination: Grid '14,' Site '4'; Narrow (MCA96 1)                                                                                                                                                                       |
| 226 | Transfer Labware | Source: Grid '14,' Site '4'; Destination: Grid '14,' Site '3'; Narrow (MCA96 1)                                                                                                                                                                       |
| 227 | Transfer Labware | Source: Grid '14,' Site '3'; Destination: Grid '14,' Site '4'; Narrow (MCA96 1)                                                                                                                                                                       |
| 228 | Transfer Labware | Source: Grid '14,' Site '4'; Destination: Grid '14,' Site '3'; Narrow (MCA96 1)                                                                                                                                                                       |
| 229 | Start Timer      | 4                                                                                                                                                                                                                                                     |
| 230 | Wait for Timer   | Timer 4 : 30 sec                                                                                                                                                                                                                                      |
| 231 | Set Variable     | SAMPLE_CNT = Number of samples                                                                                                                                                                                                                        |
| 232 | Begin Loop       | 24 times "wash End-repair"                                                                                                                                                                                                                            |
| 233 | Get DiTis        |  DiTi aluminium 200 ul                                                                                                                                             |
| 234 | Aspirate         |   105 µl Helena Water free dispense<br>"Magnet pos 1" (Col. 1, Rows 1-4)        |
| 235 | Drop DiTis       |  DiTi LiHa Waste                                                                                                                                                   |
| 236 | End Loop         | "wash End-repair"                                                                                                                                                                                                                                     |
| 237 | Set Variable     | SAMPLE_CNT = -1                                                                                                                                                                                                                                       |
| 238 | Transfer Labware | Source: Grid '14,' Site '3'; Destination: Grid '14,' Site '2'; Narrow (MCA96 1)                                                                                                                                                                       |

|     |                  |                                                                                                                                                                                                                                               |
|-----|------------------|-----------------------------------------------------------------------------------------------------------------------------------------------------------------------------------------------------------------------------------------------|
| 239 | Group End        | Wash after End-repair                                                                                                                                                                                                                         |
| 240 | Group            | A-tailing                                                                                                                                                                                                                                     |
| 241 | Get DiTis        |  DiTi aluminium 200 ul                                                                                                                                       |
| 242 | Set Variable     | SAMPLE_CNT = Number of samples                                                                                                                                                                                                                |
| 243 | Begin Loop       | 4 times "4 first wells"                                                                                                                                                                                                                       |
| 244 | Aspirate         |  25 µl Helena Water free dispense<br>"Labware1" (Col. 1, Row 3)                                                                                              |
| 245 | Aspirate         |  25 µl Helena Water free dispense<br>"Labware1" (Col. 1, Row 3)                                                                                              |
| 246 | Aspirate         |  25 µl Helena Water free dispense<br>"Labware1" (Col. 1, Row 3)                                                                                              |
| 247 | Aspirate         |  25 µl Helena Water free dispense<br>"Labware1" (Col. 1, Row 3)                                                                                              |
| 248 | Dispense         |   25 µl Water Detect 500µL<br>"Working plate" (Col. 1, Rows 1-4) , 1 option |
| 249 | End Loop         | "4 first wells"                                                                                                                                                                                                                               |
| 250 | Set Variable     | SAMPLE_CNT = -1                                                                                                                                                                                                                               |
| 251 | Drop DiTis       |  DiTi LiHa Waste                                                                                                                                           |
| 252 | Get DiTis        | Grid 32; Site: 3 (DiTi 200ul Nested MCA96)<br>Fetch 8 rows and 12 columns                                                                                                                                                                     |
| 253 | Mix              |  35 µl Helena Water free dispense<br>"Working plate" (Col. 1, Rows 1-8)                                                                                    |
| 254 | Begin Loop       | 6 times "4 first wells"                                                                                                                                                                                                                       |
| 255 | Start Timer      | 5                                                                                                                                                                                                                                             |
| 256 | Wait for Timer   | Timer 5 : 300 sec                                                                                                                                                                                                                             |
| 257 | Mix              |  35 µl Helena Water free dispense<br>"Working plate" (Col. 1, Rows 1-8)                                                                                    |
| 258 | End Loop         | "4 first wells"                                                                                                                                                                                                                               |
| 259 | Drop DiTis       | Grid 32; Site: 19 (DiTi Nested Waste)                                                                                                                                                                                                         |
| 260 | Transfer Labware | Source: Grid '32,' Site '3'; Destination: Grid '32', Site '19'; Narrow<br>(MCA96 1)                                                                                                                                                           |
| 261 | Transfer Labware | Source: Grid '14,' Site '2'; Destination: Grid '14', Site '3'; Narrow<br>(MCA96 1)                                                                                                                                                            |
| 262 | Group End        | A-tailing                                                                                                                                                                                                                                     |

|     |                  |                                                                                                                                                                                                                                                           |
|-----|------------------|-----------------------------------------------------------------------------------------------------------------------------------------------------------------------------------------------------------------------------------------------------------|
| 263 | Group            | Wash after A-tailing                                                                                                                                                                                                                                      |
| 264 | Set Variable     | SAMPLE_CNT = Number of samples                                                                                                                                                                                                                            |
| 265 | Begin Loop       | 24 times "wash after a-tailing"                                                                                                                                                                                                                           |
| 266 | Get DiTis        |  DiTi aluminium 200 ul                                                                                                                                                   |
| 267 | Aspirate         |   30 µl Helena Water free dispense<br>"Magnet pos 1" (Col. 1, Rows 1-4) , 1 option      |
| 268 | Drop DiTis       |  DiTi LiHa Waste                                                                                                                                                         |
| 269 | End Loop         | "wash after a-tailing"                                                                                                                                                                                                                                    |
| 270 | Set Variable     | SAMPLE_CNT = -1                                                                                                                                                                                                                                           |
| 271 | Get DiTis        |  DiTi aluminium 200 ul                                                                                                                                                   |
| 272 | Set Variable     | SAMPLE_CNT = Number of samples                                                                                                                                                                                                                            |
| 273 | Begin Loop       | 24 times "wash after a-tailing_1"                                                                                                                                                                                                                         |
| 274 | Aspirate         |   100 µl Helena Water free dispense<br>"PBS" (Col. 1, Rows 3-6)                     |
| 275 | Dispense         |   100 µl Helena Water free dispense<br>"Magnet pos 1" (Col. 1, Rows 1-4) , 1 option |
| 276 | End Loop         | "wash after a-tailing_1"                                                                                                                                                                                                                                  |
| 277 | Set Variable     | SAMPLE_CNT = -1                                                                                                                                                                                                                                           |
| 278 | Drop DiTis       |  DiTi LiHa Waste                                                                                                                                                       |
| 279 | Transfer Labware | Source: Grid '14,' Site '3'; Destination: Grid '14', Site '4'; Narrow (MCA96 1)                                                                                                                                                                           |
| 280 | Transfer Labware | Source: Grid '14,' Site '4'; Destination: Grid '14', Site '3'; Narrow (MCA96 1)                                                                                                                                                                           |
| 281 | Transfer Labware | Source: Grid '14,' Site '3'; Destination: Grid '14', Site '4'; Narrow (MCA96 1)                                                                                                                                                                           |
| 282 | Transfer Labware | Source: Grid '14,' Site '4'; Destination: Grid '14', Site '3'; Narrow (MCA96 1)                                                                                                                                                                           |
| 283 | Transfer Labware | Source: Grid '14,' Site '3'; Destination: Grid '14', Site '4'; Narrow (MCA96 1)                                                                                                                                                                           |
| 284 | Transfer Labware | Source: Grid '14,' Site '4'; Destination: Grid '14', Site '3'; Narrow (MCA96 1)                                                                                                                                                                           |
| 285 | Set Variable     | SAMPLE_CNT = Number of samples                                                                                                                                                                                                                            |
| 286 | Begin Loop       | 24 times "wash after a-tailing_2"                                                                                                                                                                                                                         |

|     |                  |                                                                                                                                                                            |                                                                                   |
|-----|------------------|----------------------------------------------------------------------------------------------------------------------------------------------------------------------------|-----------------------------------------------------------------------------------|
| 287 | Get DiTis        |                                                                                           | DiTi aluminium 200 ul                                                             |
| 288 | Aspirate         | <br>     | 100 µl Helena Water free dispense<br>"Magnet pos 1" (Col. 1, Rows 1-4) , 1 option |
| 289 | Drop DiTis       |                                                                                           | DiTi LiHa Waste                                                                   |
| 290 | End Loop         |                                                                                                                                                                            | "wash after a-tailing_2"                                                          |
| 291 | Set Variable     |                                                                                                                                                                            | SAMPLE_CNT = -1                                                                   |
| 292 | Get DiTis        |                                                                                           | DiTi aluminium 200 ul                                                             |
| 293 | Set Variable     |                                                                                                                                                                            | SAMPLE_CNT = Number of samples                                                    |
| 294 | Begin Loop       |                                                                                                                                                                            | 24 times "wash after a-tailing_3"                                                 |
| 295 | Aspirate         | <br>     | 100 µl Helena Water free dispense<br>"PBS" (Col. 1, Rows 3-6)                     |
| 296 | Dispense         | <br>     | 100 µl Helena Water free dispense<br>"Magnet pos 1" (Col. 1, Rows 1-4) , 1 option |
| 297 | End Loop         |                                                                                                                                                                            | "wash after a-tailing_3"                                                          |
| 298 | Set Variable     |                                                                                                                                                                            | SAMPLE_CNT = -1                                                                   |
| 299 | Drop DiTis       |                                                                                         | DiTi LiHa Waste                                                                   |
| 300 | Transfer Labware |                                                                                                                                                                            | Source: Grid '14,' Site '3'; Destination: Grid '14,' Site '4'; Narrow (MCA96 1)   |
| 301 | Transfer Labware |                                                                                                                                                                            | Source: Grid '14,' Site '4'; Destination: Grid '14,' Site '3'; Narrow (MCA96 1)   |
| 302 | Transfer Labware |                                                                                                                                                                            | Source: Grid '14,' Site '3'; Destination: Grid '14,' Site '4'; Narrow (MCA96 1)   |
| 303 | Transfer Labware |                                                                                                                                                                            | Source: Grid '14,' Site '4'; Destination: Grid '14,' Site '3'; Narrow (MCA96 1)   |
| 304 | Transfer Labware |                                                                                                                                                                            | Source: Grid '14,' Site '3'; Destination: Grid '14,' Site '4'; Narrow (MCA96 1)   |
| 305 | Transfer Labware |                                                                                                                                                                            | Source: Grid '14,' Site '4'; Destination: Grid '14,' Site '3'; Narrow (MCA96 1)   |
| 306 | Set Variable     |                                                                                                                                                                            | SAMPLE_CNT = Number of samples                                                    |
| 307 | Begin Loop       |                                                                                                                                                                            | 24 times "wash after a-tailing_4"                                                 |
| 308 | Get DiTis        |                                                                                         | DiTi aluminium 200 ul                                                             |
| 309 | Aspirate         | <br> | 100 µl Helena Water free dispense<br>"Magnet pos 1" (Col. 1, Rows 1-4) , 1 option |
| 310 | Drop DiTis       |                                                                                         | DiTi LiHa Waste                                                                   |

|     |                  |                                                                                                                                                                                                                                                             |
|-----|------------------|-------------------------------------------------------------------------------------------------------------------------------------------------------------------------------------------------------------------------------------------------------------|
| 311 | End Loop         | "wash after a-tailing_4"                                                                                                                                                                                                                                    |
| 312 | Set Variable     | SAMPLE_CNT = -1                                                                                                                                                                                                                                             |
| 313 | Transfer Labware | Source: Grid '14,' Site '3'; Destination: Grid '14', Site '2'; Narrow (MCA96 1)                                                                                                                                                                             |
| 314 | Group End        | Wash after A-tailing                                                                                                                                                                                                                                        |
| 315 | Group            | Adaptor ligation                                                                                                                                                                                                                                            |
| 316 | Set Variable     | SAMPLE_CNT = Number of samples                                                                                                                                                                                                                              |
| 317 | Begin Loop       | 24 times "adaptor ligation"                                                                                                                                                                                                                                 |
| 318 | Get DiTis        |  DiTi aluminium 50ul                                                                                                                                                       |
| 319 | Aspirate         |   13 µl Helena Water free dispense "Adaptors" (Col. 1, Rows 1-4) , 1 option               |
| 320 | Dispense         |   13 µl Water free dispense DiTi 50 "Working plate" (Col. 1, Rows 1-4) , 1 option         |
| 321 | Drop DiTis       |  DiTi LiHa Waste                                                                                                                                                          |
| 322 | End Loop         | "adaptor ligation"                                                                                                                                                                                                                                          |
| 323 | Set Variable     | SAMPLE_CNT = -1                                                                                                                                                                                                                                             |
| 324 | Set Variable     | SAMPLE_CNT = Number of samples                                                                                                                                                                                                                              |
| 325 | Begin Loop       | 24 times "adaptor ligation_1"                                                                                                                                                                                                                               |
| 326 | Get DiTis        |  DiTi aluminium 200 ul                                                                                                                                                   |
| 327 | Aspirate         |   13 µl Helena Water free dispense "Labware1" (Col. 1, Row 4)                         |
| 328 | Aspirate         |   13 µl Helena Water free dispense "Labware1" (Col. 1, Row 4)                         |
| 329 | Aspirate         |   13 µl Helena Water free dispense "Labware1" (Col. 1, Row 4)                         |
| 330 | Aspirate         |   13 µl Helena Water free dispense "Labware1" (Col. 1, Row 4)                         |
| 331 | Dispense         |   13 µl Water free dispense DiTi 50 "Working plate" (Col. 1, Rows 1-4) , 1 option     |
| 332 | Mix              |   5 x 45 µl Water free dispense DiTi 50 "Working plate" (Col. 1, Rows 1-4) , 1 option |
| 333 | Drop DiTis       |  DiTi LiHa Waste                                                                                                                                                         |
| 334 | End Loop         | "adaptor ligation_1"                                                                                                                                                                                                                                        |

|     |                  |                                                                                                                                                                                                                                                          |
|-----|------------------|----------------------------------------------------------------------------------------------------------------------------------------------------------------------------------------------------------------------------------------------------------|
| 335 | Set Variable     | SAMPLE_CNT = -1                                                                                                                                                                                                                                          |
| 336 | Get DiTis        | Grid 32; Site: 4 (DiTi 200ul Nested MCA96)<br>Fetch 8 rows and 12 columns                                                                                                                                                                                |
| 337 | Begin Loop       | 3 times "4 first wells"                                                                                                                                                                                                                                  |
| 338 | Start Timer      | 6                                                                                                                                                                                                                                                        |
| 339 | Wait for Timer   | Timer 6 : 300 sec                                                                                                                                                                                                                                        |
| 340 | Mix              |  35 µl Helena Water free dispense<br>"Working plate" (Col. 1, Rows 1-8)                                                                                                 |
| 341 | End Loop         | "4 first wells"                                                                                                                                                                                                                                          |
| 342 | Drop DiTis       | Grid 32; Site: 19 (DiTi Nested Waste)                                                                                                                                                                                                                    |
| 343 | Transfer Labware | Source: Grid '32,' Site '4'; Destination: Grid '32,' Site '19'; Narrow (MCA96 1)                                                                                                                                                                         |
| 344 | Transfer Labware | Source: Grid '14,' Site '2'; Destination: Grid '14,' Site '3'; Narrow (MCA96 1)                                                                                                                                                                          |
| 345 | Start Timer      | 7                                                                                                                                                                                                                                                        |
| 346 | Wait for Timer   | Timer 7 : 60 sec                                                                                                                                                                                                                                         |
| 347 | Set Variable     | SAMPLE_CNT = Number of samples                                                                                                                                                                                                                           |
| 348 | Begin Loop       | 24 times "adaptor ligation _1"                                                                                                                                                                                                                           |
| 349 | Get DiTis        |  DiTi aluminium 200 ul                                                                                                                                                |
| 350 | Aspirate         |   26 µl Helena Water free dispense<br>"Magnet pos 1" (Col. 1, Rows 1-4) , 1 option |
| 351 | Drop DiTis       |  DiTi LiHa Waste                                                                                                                                                      |
| 352 | End Loop         | "adaptor ligation _1"                                                                                                                                                                                                                                    |
| 353 | Set Variable     | SAMPLE_CNT = -1                                                                                                                                                                                                                                          |
| 354 | Group End        | Adaptor ligation                                                                                                                                                                                                                                         |
| 355 | Group            | Wash after adaptor ligation                                                                                                                                                                                                                              |
| 356 | Get DiTis        |  DiTi aluminium 200 ul                                                                                                                                                |
| 357 | Set Variable     | SAMPLE_CNT = Number of samples                                                                                                                                                                                                                           |
| 358 | Begin Loop       | 24 times "wash efter adaptor ligation"                                                                                                                                                                                                                   |

|     |                  |                                                                                                                                                                            |                                                                                    |
|-----|------------------|----------------------------------------------------------------------------------------------------------------------------------------------------------------------------|------------------------------------------------------------------------------------|
| 359 | Aspirate         |                                                                                           | 100 µl Helena Water free dispense<br>"IPWB2" (Col. 1, Rows 3-6)                    |
| 360 | Dispense         | <br>     | 100 µl Helena Water free dispense<br>"Magnet pos 1" (Col. 1, Rows 1-4) , 1 option  |
| 361 | End Loop         |                                                                                                                                                                            | "wash efter adaptor ligation"                                                      |
| 362 | Set Variable     |                                                                                                                                                                            | SAMPLE_CNT = -1                                                                    |
| 363 | Drop DiTis       |                                                                                           | DiTi LiHa Waste                                                                    |
| 364 | Transfer Labware |                                                                                                                                                                            | Source: Grid '14,' Site '3'; Destination: Grid '14,' Site '4'; Narrow<br>(MCA96 1) |
| 365 | Transfer Labware |                                                                                                                                                                            | Source: Grid '14,' Site '4'; Destination: Grid '14,' Site '3'; Narrow<br>(MCA96 1) |
| 366 | Transfer Labware |                                                                                                                                                                            | Source: Grid '14,' Site '3'; Destination: Grid '14,' Site '4'; Narrow<br>(MCA96 1) |
| 367 | Transfer Labware |                                                                                                                                                                            | Source: Grid '14,' Site '4'; Destination: Grid '14,' Site '3'; Narrow<br>(MCA96 1) |
| 368 | Start Timer      |                                                                                                                                                                            | 8                                                                                  |
| 369 | Wait for Timer   |                                                                                                                                                                            | Timer 8 : 60 sec                                                                   |
| 370 | Set Variable     |                                                                                                                                                                            | SAMPLE_CNT = Number of samples                                                     |
| 371 | Begin Loop       |                                                                                                                                                                            | 24 times "wash after adaptor ligation_1"                                           |
| 372 | Get DiTis        |                                                                                         | DiTi aluminium 200 ul                                                              |
| 373 | Aspirate         | <br> | 100 µl Helena Water free dispense<br>"Magnet pos 1" (Col. 1, Rows 1-4) , 1 option  |
| 374 | Drop DiTis       |                                                                                         | DiTi LiHa Waste                                                                    |
| 375 | End Loop         |                                                                                                                                                                            | "wash after adaptor ligation_1"                                                    |
| 376 | Set Variable     |                                                                                                                                                                            | SAMPLE_CNT = -1                                                                    |
| 377 | Get DiTis        |                                                                                         | DiTi aluminium 200 ul                                                              |
| 378 | Set Variable     |                                                                                                                                                                            | SAMPLE_CNT = Number of samples                                                     |
| 379 | Begin Loop       |                                                                                                                                                                            | 24 times "wash after adaptor ligation_2"                                           |
| 380 | Aspirate         |                                                                                         | 100 µl Helena Water free dispense<br>"IPWB2" (Col. 1, Rows 3-6)                    |
| 381 | Dispense         | <br> | 100 µl Helena Water free dispense<br>"Magnet pos 1" (Col. 1, Rows 1-4) , 1 option  |
| 382 | End Loop         |                                                                                                                                                                            | "wash after adaptor ligation_2"                                                    |



|     |                  |                                                                                                                                                                                                                                                        |
|-----|------------------|--------------------------------------------------------------------------------------------------------------------------------------------------------------------------------------------------------------------------------------------------------|
| 383 | Set Variable     | SAMPLE_CNT = -1                                                                                                                                                                                                                                        |
| 384 | Drop DiTis       |  DiTi LiHa Waste                                                                                                                                                      |
| 385 | Transfer Labware | Source: Grid '14,' Site '3'; Destination: Grid '14', Site '4'; Narrow (MCA96 1)                                                                                                                                                                        |
| 386 | Transfer Labware | Source: Grid '14,' Site '4'; Destination: Grid '14', Site '3'; Narrow (MCA96 1)                                                                                                                                                                        |
| 387 | Transfer Labware | Source: Grid '14,' Site '3'; Destination: Grid '14', Site '4'; Narrow (MCA96 1)                                                                                                                                                                        |
| 388 | Transfer Labware | Source: Grid '14,' Site '4'; Destination: Grid '14', Site '3'; Narrow (MCA96 1)                                                                                                                                                                        |
| 389 | Start Timer      | 9                                                                                                                                                                                                                                                      |
| 390 | Wait for Timer   | Timer 9 : 60 sec                                                                                                                                                                                                                                       |
| 391 | Set Variable     | SAMPLE_CNT = Number of samples                                                                                                                                                                                                                         |
| 392 | Begin Loop       | 24 times "wash after adaptor ligation_3"                                                                                                                                                                                                               |
| 393 | Get DiTis        |  DiTi aluminium 200 ul                                                                                                                                               |
| 394 | Aspirate         |   100 µl Helena Water free dispense "Magnet pos 1" (Col. 1, Rows 1-4) , 1 option |
| 395 | Drop DiTis       |  DiTi LiHa Waste                                                                                                                                                    |
| 396 | End Loop         | "wash after adaptor ligation_3"                                                                                                                                                                                                                        |
| 397 | Set Variable     | SAMPLE_CNT = -1                                                                                                                                                                                                                                        |
| 398 | Get DiTis        |  DiTi aluminium 200 ul                                                                                                                                              |
| 399 | Set Variable     | SAMPLE_CNT = Number of samples                                                                                                                                                                                                                         |
| 400 | Begin Loop       | 24 times "wash after adaptor ligation_4"                                                                                                                                                                                                               |
| 401 | Aspirate         |   100 µl Helena Water free dispense "PBS" (Col. 1, Rows 3-6)                     |
| 402 | Dispense         |   100 µl Helena Water free dispense "Magnet pos 1" (Col. 1, Rows 1-4) , 1 option |
| 403 | End Loop         | "wash after adaptor ligation_4"                                                                                                                                                                                                                        |
| 404 | Set Variable     | SAMPLE_CNT = -1                                                                                                                                                                                                                                        |
| 405 | Drop DiTis       |  DiTi LiHa Waste                                                                                                                                                    |
| 406 | Transfer Labware | Source: Grid '14,' Site '3'; Destination: Grid '14', Site '4'; Narrow (MCA96 1)                                                                                                                                                                        |

|     |                  |                                                                                                                                                                                                                                                       |
|-----|------------------|-------------------------------------------------------------------------------------------------------------------------------------------------------------------------------------------------------------------------------------------------------|
| 407 | Transfer Labware | Source: Grid '14,' Site '4'; Destination: Grid '14', Site '3'; Narrow (MCA96 1)                                                                                                                                                                       |
| 408 | Transfer Labware | Source: Grid '14,' Site '3'; Destination: Grid '14', Site '4'; Narrow (MCA96 1)                                                                                                                                                                       |
| 409 | Transfer Labware | Source: Grid '14,' Site '4'; Destination: Grid '14', Site '3'; Narrow (MCA96 1)                                                                                                                                                                       |
| 410 | Start Timer      | 10                                                                                                                                                                                                                                                    |
| 411 | Wait for Timer   | Timer 10 : 60 sec                                                                                                                                                                                                                                     |
| 412 | Set Variable     | SAMPLE_CNT = Number of samples                                                                                                                                                                                                                        |
| 413 | Begin Loop       | 24 times "wash after adaptor ligation_5"                                                                                                                                                                                                              |
| 414 | Get DiTis        |  DiTi aluminium 200 ul                                                                                                                                               |
| 415 | Aspirate         |   100 µl Helena Water free dispense "Magnet pos 1" (Col. 1, Rows 1-4) , 1 option    |
| 416 | Drop DiTis       |  DiTi LiHa Waste                                                                                                                                                     |
| 417 | End Loop         | "wash after adaptor ligation_5"                                                                                                                                                                                                                       |
| 418 | Set Variable     | SAMPLE_CNT = -1                                                                                                                                                                                                                                       |
| 419 | Group End        | Wash after adaptor ligation                                                                                                                                                                                                                           |
| 420 | Group            | Elution                                                                                                                                                                                                                                               |
| 421 | Get DiTis        |  DiTi aluminium 200 ul                                                                                                                                             |
| 422 | Set Variable     | SAMPLE_CNT = Number of samples                                                                                                                                                                                                                        |
| 423 | Begin Loop       | 24 times "Elution"                                                                                                                                                                                                                                    |
| 424 | Aspirate         |   50 µl Helena Water free dispense "Labware1" (Col. 1, Row 5)                   |
| 425 | Aspirate         |   50 µl Helena Water free dispense "Labware1" (Col. 1, Row 5)                   |
| 426 | Aspirate         |   50 µl Helena Water free dispense "Labware1" (Col. 1, Row 5)                   |
| 427 | Aspirate         |   50 µl Helena Water free dispense "Labware1" (Col. 1, Row 5)                   |
| 428 | Dispense         |   50 µl Helena Water free dispense "Magnet pos 1" (Col. 1, Rows 1-4) , 1 option |
| 429 | End Loop         | "Elution"                                                                                                                                                                                                                                             |
| 430 | Set Variable     | SAMPLE_CNT = -1                                                                                                                                                                                                                                       |

|     |                  |                                                                                                                                                                                                                                                          |
|-----|------------------|----------------------------------------------------------------------------------------------------------------------------------------------------------------------------------------------------------------------------------------------------------|
| 431 | Drop DiTis       |  DiTi LiHa Waste                                                                                                                                                        |
| 432 | Transfer Labware | Source: Grid '14,' Site '3'; Destination: Grid '14', Site '2'; Narrow (MCA96 1)                                                                                                                                                                          |
| 433 | User Prompt      | "Add 4 µl of Proteinase K manually and put plate in the thermal cycler for reverse cross linking."<br>" sound : once                                                                                                                                     |
| 434 | Get DiTis        | Grid 32; Site: 5 (DiTi 200ul Nested MCA96)<br>Fetch 8 rows and 12 columns                                                                                                                                                                                |
| 435 | Begin Loop       | 10 times "Mix loop 4 first wells"                                                                                                                                                                                                                        |
| 436 | Start Timer      | 11                                                                                                                                                                                                                                                       |
| 437 | Wait for Timer   | Timer 11 : 180 sec                                                                                                                                                                                                                                       |
| 438 | Mix              |  35 µl Helena Water free dispense<br>"Working plate" (Col. 1, Rows 1-8)                                                                                                 |
| 439 | End Loop         | "Mix loop 4 first wells"                                                                                                                                                                                                                                 |
| 440 | Drop DiTis       | Grid 32; Site: 19 (DiTi Nested Waste)                                                                                                                                                                                                                    |
| 441 | Transfer Labware | Source: Grid '32,' Site '5'; Destination: Grid '32', Site '19'; Narrow (MCA96 1)                                                                                                                                                                         |
| 442 | Transfer Labware | Source: Grid '14,' Site '2'; Destination: Grid '14', Site '3'; Narrow (MCA96 1)                                                                                                                                                                          |
| 443 | User Prompt      | "Put new plate on site 1"<br>" sound : once                                                                                                                                                                                                              |
| 444 | Start Timer      | 12                                                                                                                                                                                                                                                       |
| 445 | Wait for Timer   | Timer 12 : 60 sec                                                                                                                                                                                                                                        |
| 446 | Set Variable     | SAMPLE_CNT = Number of samples                                                                                                                                                                                                                           |
| 447 | Begin Loop       | 10 times "Elution 1"                                                                                                                                                                                                                                     |
| 448 | Get DiTis        |  DiTi aluminium 200 ul                                                                                                                                                |
| 449 | Aspirate         |   50 µl Helena Water free dispense<br>"Magnet pos 1" (Col. 1, Rows 1-4) , 1 option |
| 450 | Dispense         |   50 µl Helena Water free dispense<br>"New plate" (Col. 1, Rows 1-4) , 1 option    |
| 451 | Drop DiTis       |  DiTi LiHa Waste                                                                                                                                                      |
| 452 | End Loop         | "Elution 1"                                                                                                                                                                                                                                              |
| 453 | Set Variable     | SAMPLE_CNT = -1                                                                                                                                                                                                                                          |

|     |                  |                                                                                                                                                                                                                                                       |
|-----|------------------|-------------------------------------------------------------------------------------------------------------------------------------------------------------------------------------------------------------------------------------------------------|
| 454 | Group End        | Elution                                                                                                                                                                                                                                               |
| 455 | Group            | Size selection + elution with EB                                                                                                                                                                                                                      |
| 456 | Get DiTis        |  DiTi aluminium 200 ul                                                                                                                                               |
| 457 | Set Variable     | SAMPLE_CNT = Number of samples                                                                                                                                                                                                                        |
| 458 | Begin Loop       | 24 times "size selection"                                                                                                                                                                                                                             |
| 459 | Mix              |  2 x 50 µl Helena Water free dispense<br>"Labware1" (Col. 1, Row 6)                                                                                                  |
| 460 | Aspirate         |  50 µl Helena Water free dispense<br>"Labware1" (Col. 1, Row 6)                                                                                                      |
| 461 | Mix              |  2 x 50 µl Helena Water free dispense<br>"Labware1" (Col. 1, Row 6)                                                                                                  |
| 462 | Aspirate         |  50 µl Helena Water free dispense<br>"Labware1" (Col. 1, Row 6)                                                                                                      |
| 463 | Mix              |  2 x 50 µl Helena Water free dispense<br>"Labware1" (Col. 1, Row 6)                                                                                                  |
| 464 | Aspirate         |  50 µl Helena Water free dispense<br>"Labware1" (Col. 1, Row 6)                                                                                                     |
| 465 | Mix              |  2 x 50 µl Helena Water free dispense<br>"Labware1" (Col. 1, Row 6)                                                                                                |
| 466 | Aspirate         |  50 µl Helena Water free dispense<br>"Labware1" (Col. 1, Row 6)                                                                                                    |
| 467 | Dispense         |   50 µl Helena Water free dispense<br>"New plate" (Col. 1, Rows 1-4) , 1 option |
| 468 | End Loop         | "size selection"                                                                                                                                                                                                                                      |
| 469 | Set Variable     | SAMPLE_CNT = -1                                                                                                                                                                                                                                       |
| 470 | Drop DiTis       |  DiTi LiHa Waste                                                                                                                                                   |
| 471 | Get DiTis        | Grid 32; Site: 6 (DiTi 200ul Nested MCA96)<br>Fetch 8 rows and 12 columns                                                                                                                                                                             |
| 472 | Mix              |  50 µl Helena Water free dispense<br>"New plate" (Col. 1, Rows 1-8)                                                                                                |
| 473 | Drop DiTis       | Grid 32; Site: 19 (DiTi Nested Waste)                                                                                                                                                                                                                 |
| 474 | Start Timer      | 13                                                                                                                                                                                                                                                    |
| 475 | Transfer Labware | Source: Grid '32,' Site '6'; Destination: Grid '32', Site '19'; Narrow<br>(MCA96 1)                                                                                                                                                                   |
| 476 | Wait for Timer   | Timer 13 : 300 sec                                                                                                                                                                                                                                    |
| 477 | Transfer Labware | Source: Grid '14,' Site '3'; Destination: Grid '32', Site '19'; Narrow<br>(MCA96 1)                                                                                                                                                                   |

|     |                  |                                                                                                                                                                                                                                                        |
|-----|------------------|--------------------------------------------------------------------------------------------------------------------------------------------------------------------------------------------------------------------------------------------------------|
| 478 | Transfer Labware | Source: Grid '14,' Site '1'; Destination: Grid '14', Site '3'; Narrow (MCA96 1)                                                                                                                                                                        |
| 479 | Start Timer      | 14                                                                                                                                                                                                                                                     |
| 480 | Wait for Timer   | Timer 14 : 60 sec                                                                                                                                                                                                                                      |
| 481 | Set Variable     | SAMPLE_CNT = Number of samples                                                                                                                                                                                                                         |
| 482 | Begin Loop       | 24 times "size selection_1"                                                                                                                                                                                                                            |
| 483 | Get DiTis        |  DiTi aluminium 200 ul                                                                                                                                                |
| 484 | Aspirate         |   50 µl Helena Water free dispense "Magnet pos 1" (Col. 1, Rows 1-4) , 1 option      |
| 485 | Drop DiTis       |  DiTi LiHa Waste                                                                                                                                                      |
| 486 | End Loop         | "size selection_1"                                                                                                                                                                                                                                     |
| 487 | Set Variable     | SAMPLE_CNT = -1                                                                                                                                                                                                                                        |
| 488 | Get DiTis        |  DiTi aluminium 200 ul                                                                                                                                               |
| 489 | Set Variable     | SAMPLE_CNT = Number of samples                                                                                                                                                                                                                         |
| 490 | Begin Loop       | 24 times "size selection_wash"                                                                                                                                                                                                                         |
| 491 | Mix              |   5 x 150 µl Helena Water free dispense "70 percent EtOH" (Col. 1, Rows 3-6)     |
| 492 | Aspirate         |   150 µl Helena Water free dispense "70 percent EtOH" (Col. 1, Rows 3-6)         |
| 493 | Dispense         |   150 µl Helena Water free dispense "Magnet pos 1" (Col. 1, Rows 1-4) , 1 option |
| 494 | End Loop         | "size selection_wash"                                                                                                                                                                                                                                  |
| 495 | Set Variable     | SAMPLE_CNT = -1                                                                                                                                                                                                                                        |
| 496 | Drop DiTis       |  DiTi LiHa Waste                                                                                                                                                    |
| 497 | Transfer Labware | Source: Grid '14,' Site '3'; Destination: Grid '14', Site '4'; Narrow (MCA96 1)                                                                                                                                                                        |
| 498 | Transfer Labware | Source: Grid '14,' Site '4'; Destination: Grid '14', Site '3'; Narrow (MCA96 1)                                                                                                                                                                        |
| 499 | Transfer Labware | Source: Grid '14,' Site '3'; Destination: Grid '14', Site '4'; Narrow (MCA96 1)                                                                                                                                                                        |
| 500 | Transfer Labware | Source: Grid '14,' Site '4'; Destination: Grid '14', Site '3'; Narrow (MCA96 1)                                                                                                                                                                        |
| 501 | Transfer Labware | Source: Grid '14,' Site '3'; Destination: Grid '14', Site '4'; Narrow (MCA96 1)                                                                                                                                                                        |

|     |                  |                                                                                                                                                                                                                                                        |
|-----|------------------|--------------------------------------------------------------------------------------------------------------------------------------------------------------------------------------------------------------------------------------------------------|
| 502 | Transfer Labware | Source: Grid '14,' Site '4'; Destination: Grid '14,' Site '3'; Narrow (MCA96 1)                                                                                                                                                                        |
| 503 | Set Variable     | SAMPLE_CNT = Number of samples                                                                                                                                                                                                                         |
| 504 | Begin Loop       | 24 times "size selection_wash_2"                                                                                                                                                                                                                       |
| 505 | Get DiTis        |  DiTi aluminium 200 ul                                                                                                                                                |
| 506 | Aspirate         |   150 µl Helena Water free dispense "Magnet pos 1" (Col. 1, Rows 1-4) , 1 option     |
| 507 | Drop DiTis       |  DiTi LiHa Waste                                                                                                                                                      |
| 508 | End Loop         | "size selection_wash_2"                                                                                                                                                                                                                                |
| 509 | Set Variable     | SAMPLE_CNT = -1                                                                                                                                                                                                                                        |
| 510 | Get DiTis        |  DiTi aluminium 200 ul                                                                                                                                                |
| 511 | Mix              |   5 x 150 µl Helena Water free dispense "70 percent EtOH" (Col. 1, Rows 3-6)         |
| 512 | Set Variable     | SAMPLE_CNT = Number of samples                                                                                                                                                                                                                         |
| 513 | Begin Loop       | 24 times "size selection_wash_3"                                                                                                                                                                                                                       |
| 514 | Aspirate         |   150 µl Helena Water free dispense "70 percent EtOH" (Col. 1, Rows 3-6)         |
| 515 | Dispense         |   150 µl Helena Water free dispense "Magnet pos 1" (Col. 1, Rows 1-4) , 1 option |
| 516 | End Loop         | "size selection_wash_3"                                                                                                                                                                                                                                |
| 517 | Set Variable     | SAMPLE_CNT = -1                                                                                                                                                                                                                                        |
| 518 | Drop DiTis       |  DiTi LiHa Waste                                                                                                                                                    |
| 519 | Transfer Labware | Source: Grid '14,' Site '3'; Destination: Grid '14,' Site '4'; Narrow (MCA96 1)                                                                                                                                                                        |
| 520 | Transfer Labware | Source: Grid '14,' Site '4'; Destination: Grid '14,' Site '3'; Narrow (MCA96 1)                                                                                                                                                                        |
| 521 | Transfer Labware | Source: Grid '14,' Site '3'; Destination: Grid '14,' Site '4'; Narrow (MCA96 1)                                                                                                                                                                        |
| 522 | Transfer Labware | Source: Grid '14,' Site '4'; Destination: Grid '14,' Site '3'; Narrow (MCA96 1)                                                                                                                                                                        |
| 523 | Transfer Labware | Source: Grid '14,' Site '3'; Destination: Grid '14,' Site '4'; Narrow (MCA96 1)                                                                                                                                                                        |
| 524 | Transfer Labware | Source: Grid '14,' Site '4'; Destination: Grid '14,' Site '3'; Narrow (MCA96 1)                                                                                                                                                                        |
| 525 | Set Variable     | SAMPLE_CNT = Number of samples                                                                                                                                                                                                                         |

|     |                  |                                                                                                                                                                                                                                                             |
|-----|------------------|-------------------------------------------------------------------------------------------------------------------------------------------------------------------------------------------------------------------------------------------------------------|
| 526 | Begin Loop       | 24 times "size selection_wash_4"                                                                                                                                                                                                                            |
| 527 | Get DiTis        |  DiTi aluminium 200 ul                                                                                                                                                     |
| 528 | Aspirate         |   150 µl Helena Water free dispense "Magnet pos 1" (Col. 1, Rows 1-4) , 1 option          |
| 529 | Drop DiTis       |  DiTi LiHa Waste                                                                                                                                                           |
| 530 | End Loop         | "size selection_wash_4"                                                                                                                                                                                                                                     |
| 531 | Set Variable     | SAMPLE_CNT = -1                                                                                                                                                                                                                                             |
| 532 | Start Timer      | 15                                                                                                                                                                                                                                                          |
| 533 | Wait for Timer   | Timer 15 : 300 sec                                                                                                                                                                                                                                          |
| 534 | Get DiTis        |  DiTi aluminium 200 ul                                                                                                                                                     |
| 535 | Set Variable     | SAMPLE_CNT = Number of samples                                                                                                                                                                                                                              |
| 536 | Begin Loop       | 24 times "EB"                                                                                                                                                                                                                                               |
| 537 | Aspirate         |  30 µl Helena Water free dispense "Labware1" (Col. 1, Row 7)                                                                                                             |
| 538 | Aspirate         |  30 µl Helena Water free dispense "Labware1" (Col. 1, Row 7)                                                                                                             |
| 539 | Aspirate         |  30 µl Helena Water free dispense "Labware1" (Col. 1, Row 7)                                                                                                             |
| 540 | Aspirate         |  30 µl Helena Water free dispense "Labware1" (Col. 1, Row 7)                                                                                                             |
| 541 | Dispense         |   30 µl Helena Water free dispense "Magnet pos 1" (Col. 1, Rows 1-4) , 1 option       |
| 542 | End Loop         | "EB"                                                                                                                                                                                                                                                        |
| 543 | Set Variable     | SAMPLE_CNT = -1                                                                                                                                                                                                                                             |
| 544 | Drop DiTis       |  DiTi LiHa Waste                                                                                                                                                         |
| 545 | Transfer Labware | Source: Grid '14,' Site '3'; Destination: Grid '14', Site '2'; Narrow (MCA96 1)                                                                                                                                                                             |
| 546 | Set Variable     | SAMPLE_CNT = Number of samples                                                                                                                                                                                                                              |
| 547 | Begin Loop       | 24 times "EB_2"                                                                                                                                                                                                                                             |
| 548 | Get DiTis        |  DiTi aluminium 200 ul                                                                                                                                                   |
| 549 | Mix              |   20 x 30 µl Helena Water free dispense "Working plate" (Col. 1, Rows 1-4) , 1 option |

|     |                  |                                                                                                                                                                            |                                                                                       |
|-----|------------------|----------------------------------------------------------------------------------------------------------------------------------------------------------------------------|---------------------------------------------------------------------------------------|
| 550 | Drop DiTis       |                                                                                           | DiTi LiHa Waste                                                                       |
| 551 | End Loop         | "EB_2"                                                                                                                                                                     |                                                                                       |
| 552 | Set Variable     | SAMPLE_CNT = -1                                                                                                                                                            |                                                                                       |
| 553 | Start Timer      | 16                                                                                                                                                                         |                                                                                       |
| 554 | Wait for Timer   | Timer 16 : 150 sec                                                                                                                                                         |                                                                                       |
| 555 | Set Variable     | SAMPLE_CNT = Number of samples                                                                                                                                             |                                                                                       |
| 556 | Begin Loop       | 24 times "EB_2"                                                                                                                                                            |                                                                                       |
| 557 | Get DiTis        |                                                                                           | DiTi aluminium 200 ul                                                                 |
| 558 | Mix              | <br>     | 5 x 30 µl Helena Water free dispense<br>"Working plate" (Col. 1, Rows 1-4) , 1 option |
| 559 | Drop DiTis       |                                                                                           | DiTi LiHa Waste                                                                       |
| 560 | End Loop         | "EB_2"                                                                                                                                                                     |                                                                                       |
| 561 | Set Variable     | SAMPLE_CNT = -1                                                                                                                                                            |                                                                                       |
| 562 | Start Timer      | 17                                                                                                                                                                         |                                                                                       |
| 563 | Wait for Timer   | Timer 17 : 150 sec                                                                                                                                                         |                                                                                       |
| 564 | Set Variable     | SAMPLE_CNT = Number of samples                                                                                                                                             |                                                                                       |
| 565 | Begin Loop       | 24 times "EB_2_"                                                                                                                                                           |                                                                                       |
| 566 | Get DiTis        |                                                                                         | DiTi aluminium 200 ul                                                                 |
| 567 | Mix              | <br> | 5 x 30 µl Helena Water free dispense<br>"Working plate" (Col. 1, Rows 1-4) , 1 option |
| 568 | Drop DiTis       |                                                                                         | DiTi LiHa Waste                                                                       |
| 569 | End Loop         | "EB_2_"                                                                                                                                                                    |                                                                                       |
| 570 | Set Variable     | SAMPLE_CNT = -1                                                                                                                                                            |                                                                                       |
| 571 | Transfer Labware | Source: Grid '14,' Site '2'; Destination: Grid '14', Site '3'; Narrow (MCA96 1)                                                                                            |                                                                                       |
| 572 | Start Timer      | 17                                                                                                                                                                         |                                                                                       |
| 573 | Wait for Timer   | Timer 17 : 60 sec                                                                                                                                                          |                                                                                       |



|     |              |                                                                                                                                                                                                                                                      |
|-----|--------------|------------------------------------------------------------------------------------------------------------------------------------------------------------------------------------------------------------------------------------------------------|
| 574 | Group End    | Size selection + elution with EB                                                                                                                                                                                                                     |
| 575 | Group        | PCR                                                                                                                                                                                                                                                  |
| 576 | User Prompt  | "Put new plate on site 1"<br>"<br>sound : three times                                                                                                                                                                                                |
| 577 | Set Variable | SAMPLE_CNT = Number of samples                                                                                                                                                                                                                       |
| 578 | Begin Loop   | 24 times "PCR"                                                                                                                                                                                                                                       |
| 579 | Get DiTis    |  DITi aluminium 50ul                                                                                                                                                |
| 580 | Aspirate     |   20 µl Helena Water free dispense<br>"Magnet pos 1" (Col. 1, Rows 1-4) , 1 option |
| 581 | Dispense     |   20 µl Helena Water free dispense<br>"New plate" (Col. 1, Rows 1-4) , 1 option    |
| 582 | Drop DiTis   |  DITi LiHa Waste                                                                                                                                                    |
| 583 | End Loop     | "PCR"                                                                                                                                                                                                                                                |
| 584 | Set Variable | SAMPLE_CNT = -1                                                                                                                                                                                                                                      |
| 585 | Get DiTis    |  DITi aluminium 200 ul                                                                                                                                            |
| 586 | Set Variable | SAMPLE_CNT = Number of samples                                                                                                                                                                                                                       |
| 587 | Begin Loop   | 24 times "pcr"                                                                                                                                                                                                                                       |
| 588 | Aspirate     |   6.6 µl Helena Water free dispense<br>"Labware1" (Col. 1, Row 8)              |
| 589 | Aspirate     |   6.6 µl Helena Water free dispense<br>"Labware1" (Col. 1, Row 8)              |
| 590 | Aspirate     |   6.6 µl Helena Water free dispense<br>"Labware1" (Col. 1, Row 8)              |
| 591 | Aspirate     |   6.6 µl Helena Water free dispense<br>"Labware1" (Col. 1, Row 8)              |
| 592 | Dispense     |   6.6 µl Water Detect 500µL<br>"New plate" (Col. 1, Rows 1-4) , 1 option       |
| 593 | End Loop     | "pcr"                                                                                                                                                                                                                                                |
| 594 | Set Variable | SAMPLE_CNT = -1                                                                                                                                                                                                                                      |
| 595 | Drop DiTis   |  DITi LiHa Waste                                                                                                                                                  |
| 596 | Group End    | PCR                                                                                                                                                                                                                                                  |

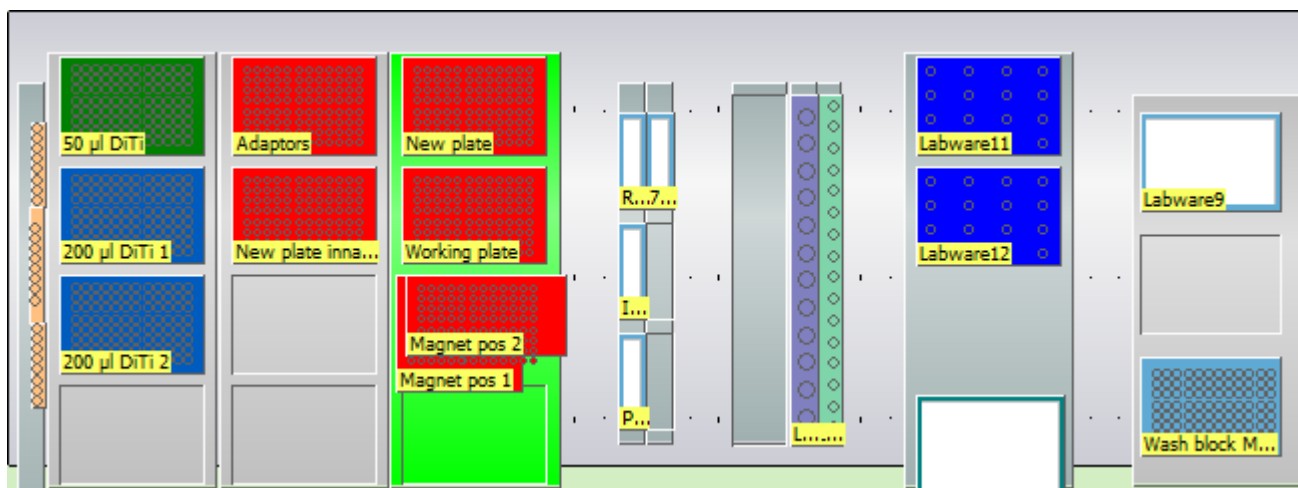

Supplement: 13072_2015_17_MOESM3_ESM.pdf [file 13072_2015_17_MOESM3_ESM.pdf]
